# Supplementary material for: Current Update on the Clinical Utility of MMSE and MoCA for Stroke Patients in Asia: A Systematic Review
Source: MDPI journal article supplement (doi:10.3390/ijerph18178962), 2021-08-25
Supplement: s1 [file s1]

**Table S1.** Terms used on database search.

| Database                    | Search format                                                                                                                                                                                                                                                                                                                                                                                                               |
|-----------------------------|-----------------------------------------------------------------------------------------------------------------------------------------------------------------------------------------------------------------------------------------------------------------------------------------------------------------------------------------------------------------------------------------------------------------------------|
| SCOPUS<br>(N = 128)         | ( TITLE-ABS-KEY ( "cognitive assessment" OR tool OR screen OR test ) AND TITLE-ABS-KEY ( stroke ) AND TITLE-ABS-KEY ( cognitive OR cognition ) AND TITLE-ABS-KEY ( impairment OR deficit ) AND TITLE-ABS-KEY ( sensitivity OR specificity ) AND NOT TITLE-ABS-KEY ( animal OR review OR brain ) ) AND ( LIMIT-TO ( DOCTYPE , "ar" ) ) AND ( LIMIT-TO ( EXACTKEYWORD , "Human" ) ) AND ( LIMIT-TO ( LANGUAGE , "English" ) ) |
| Web of Science<br>(N = 230) | TOPIC:((cognitive OR cognition)) AND TOPIC:((screening OR assessment OR tool OR test)) AND TOPIC: ((stroke OR "cerebrovascular accident")) AND TOPIC: (("cognitive impair*" OR "cognitive deficit")) AND TOPIC:(sensitivity OR specificity)<br>Refined by: DOCUMENT TYPES: (ARTICLE )                                                                                                                                       |
| Science Direct<br>(N = 162) | Timespan: All years. Indexes: SCI-EXPANDED, SSCI, A&HCI, CPCI-S, CPCI-SSH, BKCI-S, BKCI-SSH, ESCI.<br>cognitive AND (test OR screen OR assessment OR tool) AND stroke AND sensitivity AND specificity AND impairment                                                                                                                                                                                                        |
| PubMed<br>(N = 786)         | (assessment OR screen OR test OR tool) AND (cognitive OR cognition) AND (impairment OR deficit) AND (sensitivity OR specificity) AND (stroke OR CVA) NOT (review OR animal OR randomized OR motor)                                                                                                                                                                                                                          |

**Table S2.** Detailed report on SE and SP for MMSE, MoCA, and NINDS-CNS 5.

| Study               | Cut-off value               | SE, % (CI) | SP, % (CI) | PPV (CI)   | NPV (CI)   | AUC (CI)         |
|---------------------|-----------------------------|------------|------------|------------|------------|------------------|
| Dong et al.<br>2012 | MMSE $\leq$ 25/26           | 88         | 67         | 47         | 94         | 0.85 (0.80-0.91) |
|                     | MoCA $\leq$ 21/22           | 88         | 64         | 45         | 94         | 0.86 (0.81-0.91) |
|                     | NC vs. VCI-ND + VD          |            |            |            |            |                  |
| Tu et al.<br>2013   | MoCA $\leq$ 26/27           | 96         | 76         | 86         | 93         | 0.95 (0.93-0.97) |
|                     | NC & VCI-ND vs. VD          |            |            |            |            |                  |
|                     | MoCA $\leq$ 16/17           | 93         | 96         | 91         | 97         | 0.99 (0.98-1.00) |
|                     | Not education-adjusted      |            |            |            |            |                  |
|                     | MoCA $\leq$ 22/23           | 65         | 79         |            |            | 0.80 (0.74-0.86) |
|                     | Education $\leq$ 6 years    |            |            |            |            |                  |
| Wu et al.<br>2013   | MoCA $\leq$ 15              | 97         | 47         |            |            | 0.90 (0.83-0.98) |
|                     | Education 6-12 years        |            |            |            |            |                  |
|                     | MoCA $\leq$ 22              | 56         | 88         |            |            | 0.81 (0.72-0.90) |
|                     | Education > 12years         |            |            |            |            |                  |
|                     | MoCA $\leq$ 23              | 40         | 100        |            |            | 0.82 (0.68-0.96) |
|                     | NCI vs. VCI                 |            |            |            |            |                  |
|                     | MMSE $\leq$ 26              | 71         | 82         | 84         | 67         | 0.84 (0.80-0.88) |
|                     | MoCA $\leq$ 23              | 78         | 80         | 84         | 72         | 0.87 (0.83-0.91) |
|                     | NCI vs. Amnesic             |            |            |            |            |                  |
| Dong et al.<br>2014 | Global MCI                  |            |            |            |            |                  |
|                     | MMSE $\leq$ 26              | 83         | 82         | 76         | 88         | 0.91 (0.86-0.94) |
|                     | MoCA $\leq$ 23              | 88         | 80         | 75         | 90         | 0.93 (0.89-0.96) |
|                     | NCI vs. Non-amnesic         |            |            |            |            |                  |
|                     | Global MCI                  |            |            |            |            |                  |
|                     | MMSE $\leq$ 27              | 80         | 64         | 19         | 97         | 0.83 (0.71-0.94) |
|                     | MoCA $\leq$ 22              | 87         | 88         | 45         | 98         | 0.94 (0.86-1.00) |
|                     | NCI vs. Non-amnesic         |            |            |            |            |                  |
|                     | Single MCI                  |            |            |            |            |                  |
|                     | MMSE $\leq$ 26              | 42         | 82         | 38         | 84         | 0.69             |
|                     | MoCA $\leq$ 24              | 69         | 67         | 36         | 89         | 0.74             |
| Chen et al.<br>2015 | NINDS-CNS 5-Min $\leq$ 23.5 | 87 (72-95) | 73 (57-85) | 76 (60-87) | 86 (69-95) | 0.86 (0.78-0.94) |
|                     | NINDS-CNS 5-Min $\leq$ 24   | 92 (78-98) | 68 (52-81) | 73 (59-85) | 90 (73-97) |                  |
|                     | Baseline                    |            |            |            |            |                  |
|                     | MoCA $\leq$ 19/20           | 88         | 75         | 42         | 98         | 0.89             |
| Dong et al.<br>2016 | NINDS-CSN 5-Min $\leq$ 7/8  | 73         | 75         | 41         | 92         | 0.8              |
|                     | 3-6 months                  |            |            |            |            |                  |
|                     | MoCA $\leq$ 20/21           | 83         | 80         | 50         | 95         | 0.9              |
|                     | NINDS-CSN 5-min $\leq$ 7/8  | 70         | 83         | 49         | 92         | 0.83             |
|                     | VCI-ND                      |            |            |            |            |                  |
| Shen et al.<br>2016 | MMSE $\leq$ 27/28           | 82         | 78         |            |            | 0.84 (0.77-0.91) |
|                     | MoCA $\leq$ 23/24           | 86         | 75         |            |            | 0.88 (0.82-0.95) |
| Zuo et al.<br>2016  | MoCA $\leq$ 22/23           | 85         | 88         | 91         | 80         | 0.85 (0.80-0.95) |

|                     |                            |    |    |    |    |      |
|---------------------|----------------------------|----|----|----|----|------|
| Lim et al.<br>2017  | NINDS-CSN 5-Min $\leq 6/7$ | 82 | 67 | 33 | 95 | 0.74 |
| Liao et al.<br>2020 | MoCA $\leq 24$             | 63 | 71 | 74 | 60 | 0.72 |
| Zhu et al.<br>2020  | MMSE $\leq 27$             | 68 | 82 |    |    | 0.81 |
|                     | MoCA $\leq 21$             | 64 | 90 |    |    | 0.82 |

---

Notes: MMSE = Mini Mental Status Examination, MoCA = Montreal Cognitive Assessment, NINDS-CNS 5-Min = National Institute of Neurological Disorders and Stroke-Canadian Stroke Network 5-Minute Protocol, NIHSS = National Institute of Health Stroke Severity Scale; CDR = Clinical Dementia Rating, SVI = Subcortical Vascular Ischemic Dementia, VCI = Vascular cognitive impairment; PPV = Positive predictive value, NPV = Negative predictive value, AU = Area under curve, CI = 95% Confidence interval.
